# Supplementary material
Source: publisher figshare collection journal article supplement (https://acs.figshare.com/ndownloader/files/26441469)
Supplement: Supplementary file 1 [file 26441469]

			IC50 (nM)
S/N	COMPOUND	SMILES CODE	HDAC1	HDAC2	HDAC3	HDAC4	HDAC5	HDAC6	HDAC7	HDAC8	HDAC9	HDAC10	HDAC11
1	SAHA (Vorinostat)	O=C(NO)CCCCCCC(NC1=CC=CC=C1)=O						5.8
2	Ricolinostat	O=C(NCCCCCCC(NO)=O)C(C=N1)=CN=C1N(C2=CC=CC=C2)C3=CC=CC=C3						2.6
3	Citarinostat	O=C(NCCCCCCC(NO)=O)C(C=N1)=CN=C1N(C2=CC=CC=C2)C3=C(Cl)C=CC=C3						2.2
4	Tubastatin	O=C(NO)C(C=C1)=CC=C1CN2C3=CC=CC=C3C4=C2CCN(C)C4						15
5	WT161	O=C(CCCCCCC(NO)=O)N/N=C/C(C=C1)=CC=C1N(C2=CC=CC=C2)C3=CC=CC=C3						0.4
6	Tubacin	OCC1=CC=C([C@@H]2C[C@H](CSC3=NC(C4=CC=CC=C4)=C(O3)C5=CC=CC=C5)O[C@H](C6=CC=C(NC(CCCCCCC(NO)=O)=O)C=C6)O2)C=C1						1.62
7	Compound 1	FC1=C(F)C(F)=C(F)C(S(=O)(NCC2=CC=C(C(NO)=O)C=C2)=O)=C1F			>1000			389		>1000			>1000
8	Compound 2	FC1=C(F)C(F)=C(F)C(S(=O)(N(CC2=CC=C(C(NO)=O)C=C2)CC3=CC=CC=C3)=O)=C1F			>1000			9		150			122
9	Compound 3	FC1=C(F)C(F)=C(F)C(S(=O)(N(CC2=CC=C(C(NO)=O)C=C2)CC3=CC=C(F)C=C3)=O)=C1F			>1000			13		787			367
10	Compound 4	FC1=C(F)C(F)=C(F)C(S(=O)(N(CC2=CC=C(C(NO)=O)C=C2)CC3=CC=C(C(F)(F)F)C=C3)=O)=C1F			>1000			45		>1000			>1000
11	Compound 5	FC1=C(F)C(F)=C(F)C(S(=O)(N(CC2=CC=C(C(NO)=O)C=C2)CC3=CC=C(N(C)C)C=C3)=O)=C1F			>1000			29		>1000			>1000
12	Compound 6	FC1=C(F)C(F)=C(F)C(S(=O)(N(CC2=CC=C(C(NO)=O)C=C2)CC3=CC=C(C)C=C3)=O)=C1F			>1000			6		101			73
13	Compound 7	FC1=C(F)C(F)=C(F)C(S(=O)(N(CC2=CC=C(C(NO)=O)C=C2)CC3=CC=C(C(C)(C)C)C=C3)=O)=C1F			>1000			42		68			88
14	Compound 8	FC1=C(F)C(F)=C(F)C(S(=O)(N(CC2=CC=C(C(NO)=O)C=C2)CC3=CC=NC=C3)=O)=C1F			>1000			14		>1000			>1000
15	Compound 9	FC1=C(F)C(F)=C(F)C(S(=O)(N(CC2=CC=C(C(NO)=O)C=C2)CC3=CC=NC=C3)=O)=C1			>1000			11		581			472
16	Compound 10	FC1=C(F)C(F)=C(F)C(S(=O)(N(CC2=CC=C(C(NO)=O)C=C2)CC3=CC=CC=C3)=O)=C1			697			5		155			115
17	Compound 11	FC1=C(F)C(F)=C(F)C(S(=O)(N(CC2=CC=C(C(NO)=O)C=C2)CC3=CC=C(F)C=C3)=O)=C1			>1000			21		860			>1000
18	Compound 12	FC1=C(F)C(F)=C(F)C(S(=O)(N(CC2=CC=C(C(NO)=O)C=C2)CC3=CC(F)=CC=C3)=O)=C1			>1000			14		412			235
19	Compound 13	FC1=C(F)C(F)=C(F)C(S(=O)(N(CC2=CC=C(C(NO)=O)C=C2)CC3=C(F)C=CC=C3)=O)=C1			>1000			10		241			263
20	Compound 14	FC1=C(F)C(F)=C(F)C(S(=O)(N(CC2=CC=C(C(NO)=O)C=C2)CC3=NC=CC=C3)=O)=C1			896			6		332			941
21	TO-317	FC1=C(F)C=C(S(=O)(N(CC2=CC=C(C(NO)=O)C=C2)CC3=CN=CC=C3)=O)C(F)=C1F	921	4970	373	>10000	8650	2	7290	316	2750	572	4870
